# Supplementary material
Source: PubMed Central journal article supplement (PMC6335169)
Supplement: NIHMS1511006-supplement-1.pdf [file NIHMS1511006-supplement-1.pdf]

**Supplementary Table S1.** The correlation coefficients of APTw intensity and semi-quantitative ( $Path_{spec}$ ,  $Cell_{spec}$ , and  $Nec_{spec}$ ) and quantitative ( $Cell_{count}$  and Ki-67) pathologic indices

|                | $Path_{spec}$ | $Cell_{spec}$ | $Nec_{spec}$ | $Cell_{count}$ | Ki-67    |
|----------------|---------------|---------------|--------------|----------------|----------|
| APTw Intensity | 0.651***      | 0.616***      | -0.255*      | 0.580***       | 0.458*** |
| $Path_{spec}$  |               | 0.675***      | -0.286**     | 0.622***       | 0.380**  |
| $Cell_{spec}$  |               |               | -0.174       | 0.725***       | 0.495*** |
| $Nec_{spec}$   |               |               |              | -0.066         | -0.085   |
| $Cell_{count}$ |               |               |              |                | 0.587*** |

Note: Path = histopathologic assignment; Cell = cellularity; Nec = necrosis. Subscript “spec” means the specimen-based measurement from the whole specimen, and  $Cell_{count}$  and Ki-67 were quantitatively counted by image processing software semi-automatically. For  $Path_{spec}$ , we used: quiescent = 1; mixed = 2; and active = 3. For the sake of simplicity, four no tumor-containing specimens were grouped with quiescent tumor specimens for the analysis. \*  $P < 0.05$ ; \*\*  $P < 0.01$ ; \*\*\*  $P < 0.001$ .

## Supplementary Results

### Regression Analysis between APTw and Pathologic Indices

We finally performed a multiple linear regression analysis to model the relationship between APTw signal intensity and pathologic indices. We tested three potential predictor sets: [ $Path_{spec}$ ,  $Cell_{spec}$ ,  $Nec_{spec}$ , Ki-67], [ $Path_{spec}$ ,  $Cell_{count}$ ,  $Nec_{spec}$ , Ki-67], and [ $Path_{spec}$ ,  $Cell_{spec}$ ,  $Nec_{spec}$ ,  $Cell_{count}$ , Ki-67]. For  $Path_{spec}$ , we used: quiescent = 1; mixed = 2; and active = 3. Four no tumor-containing specimens were grouped with quiescent tumor specimens for the analysis. After a stepwise elimination, the same model equation was obtained:

$$APT_w = 0.620 + 0.812 \times Path_{spec} + 1.280 \times Ki-67 (R^2 = 0.546; P < 0.05). \quad [S1]$$

The histopathologic assignment ( $Path_{spec}$ : active, mixed, quiescent/no tumor) was identified as the most powerful factor that affected APTw signal intensity, followed by the Ki-67 index. These results indicated that APTw imaging can identify areas with the most malignant biological behavior, consistent with active tumor within heterogeneous brain lesions.

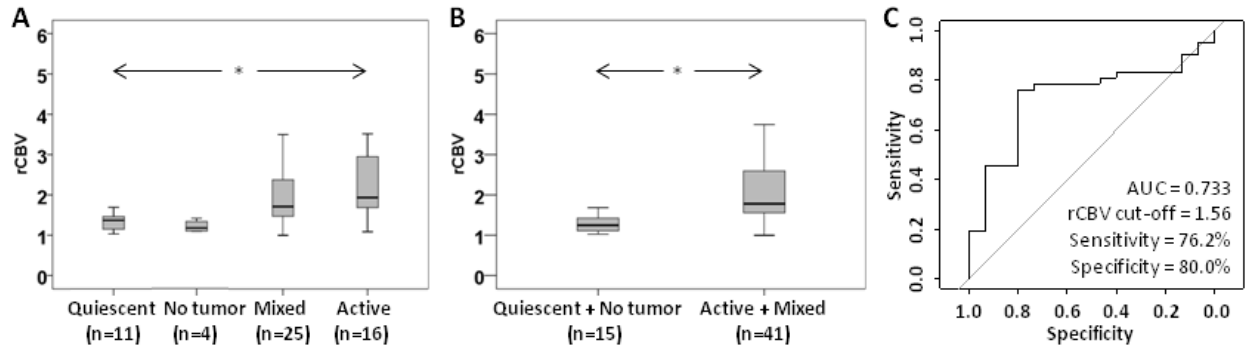

**Supplementary Fig. S1.** Quantitative analysis and diagnostic ability of rCBV. **A**, Quantitative comparison of rCBV intensities that correspond to quiescent, mixed, and active specimens, as well as non-tumor specimens. **B**, Quantitative comparison of rCBV intensities that correspond to treatment effects (non-tumor and quiescent) and tumor recurrence (mixed and active). **C**, The ROC analysis of rCBV intensities as an imaging biomarker to distinguish active glioma from treatment effects. \*  $P < 0.05$ .

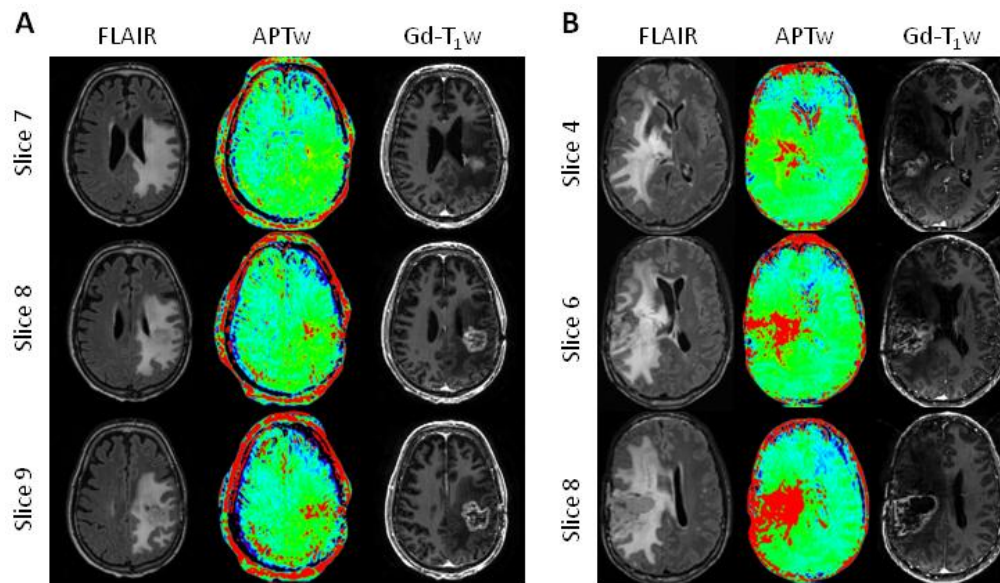

**Supplementary Fig. S2.** Anatomical and APTw MR images for a patient with treatment effect (**A**, Patient 17) and a patient with recurrent tumor (**B**, Patient 2). Only 3/15 slices acquired were shown. Areas with recurrent tumor (namely, APTw > 1.79%, compared with CNAWM) were marked in red, which were used to calculate the APTw-based recurrent tumor volume (Vol<sub>APTw</sub>).

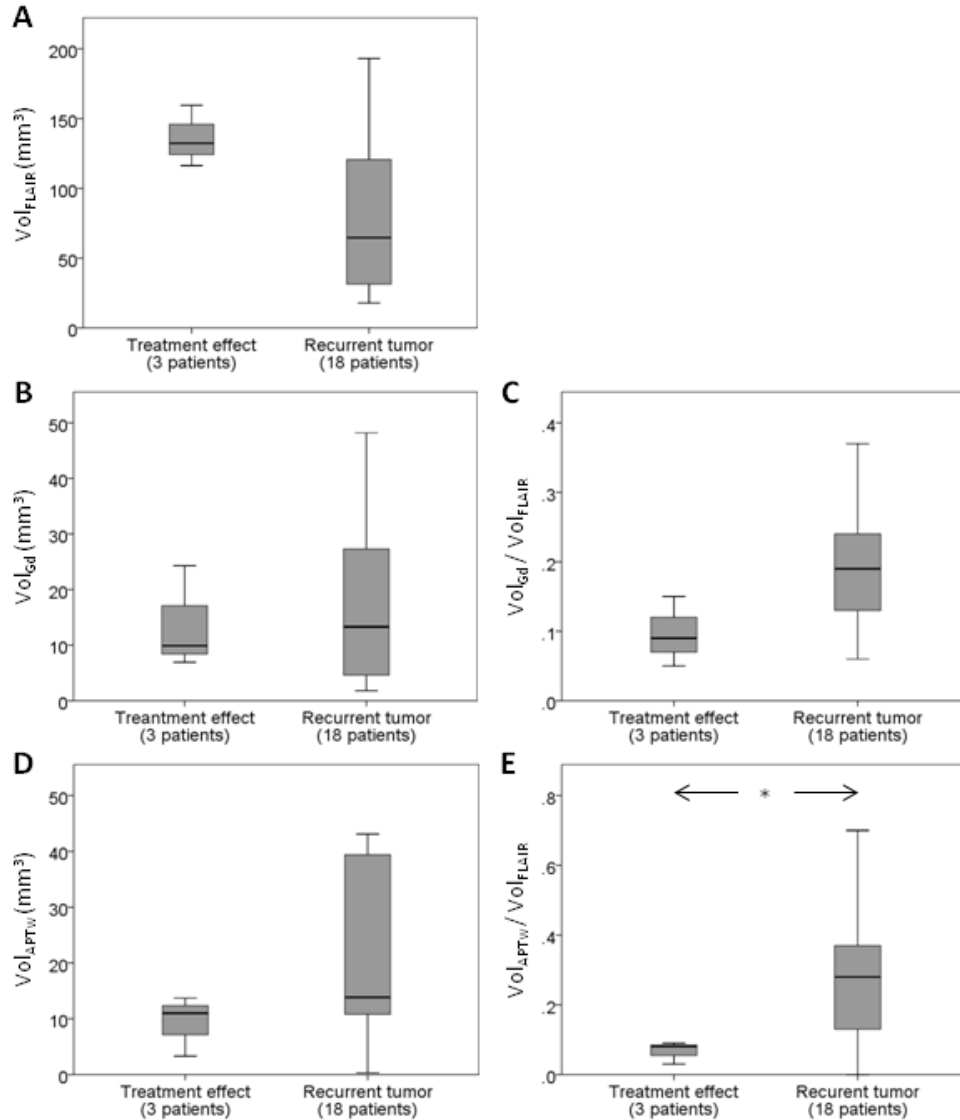

**Supplementary Fig. S3.** Comparison between tumor volumes for three patients with treatment effects and 18 patients with recurrent tumor. **A**, FLAIR hyperintensity-based tumor volumes ( $Vol_{FLAIR}$ ). **B**, Gd-enhancing tumor volumes ( $Vol_{Gd}$ ). **C**,  $Vol_{Gd}/Vol_{FLAIR}$ . **D**, APTw-based recurrent tumor volume (namely, APTw > 1.79%, compared with CNAWM;  $Vol_{APTw}$ ). **E**,  $Vol_{APTw}/Vol_{FLAIR}$ . Based on the Mann-Whitney U test, the mean tumor volumes of FLAIR hyperintensity and Gd enhancement were not significantly different between these two patient groups. However, the relative APTw-based recurrent tumor volumes ( $Vol_{APTw}/Vol_{FLAIR}$ ) were significantly lower for three patients with treatment effects than for 18 patients with recurrent tumor ( $0.07 \pm 0.03$  vs.  $0.31 \pm 0.25$ ;  $P < 0.05$ ).
